# Supplementary material for: A new generation of ultralight thermochromic indicators based on temperature induced gas release
Source: Royal Society of Chemistry journal article supplement (doi:10.1039/c1jm13088a), 2011-01-01
Supplement: c1jm13088a.pdf [file c1jm13088a.pdf]

## A new generation of ultralight thermochromic indicators based on temperature induced gas release

Ana Maria Popa\*, Rolf Eckert, Daniel Crespy, Patrick Rupper, René M. Rossi

### Supporting information

#### Relative Au4f/C1s concentrations as determined from XPS spectroscopy

| Sample name | Au4f/C1s (At%/At%) |
|-------------|--------------------|
| A_RT        | 0.47               |
| A_10min     | 0.46               |
| A_20min     | 0.44               |
| A_40min     | 0.38               |
| A_1min      | 0.11               |
| A_2min      | 0.22               |
| A_3min      | 0.30               |
| A_4min      | 0.53               |
| PVP_RT      | 0.54               |

**Table S1.** Relative Au4f/C1s concentrations as determined from XPS spectroscopy for the samples sputtered with equal amounts of gold and heated for different heating times (A\_RT through A\_40\_75) and the samples sputtered with varying amounts of gold, ranging from cca 1 to 4 nm, after heating at 75C for 40 min (A\_1min through A\_4min)

The difference in the relative concentrations between sample A\_40min and A\_3min can be explained by slight differences in the sputtering rates between two consecutive processing rounds.

### Influence of the heating temperature

The half-life of radical initiators varies with temperature according to an exponential law. For AIBA the corresponding equation was determined to be:

$$\log(t_{1/2}) = 6426(1/T) - 16.75 \quad (1)$$

where  $t$  is the time in minutes and  $T$  is the temperature in K

It is thus expected that the response time of our optical indicators will be much faster at higher temperatures. Two gold-sputtered non-wovens were treated for 10 minutes at 85°C and 95°C respectively. The corresponding half-lives of the initiator at these temperatures are 15 minutes and 5 minutes respectively. No changes at macroscopic level in the color shade of the surface were detected on the sample treated at 85°C; however the appearance of a pink hue was observed upon exposure for an equal amount at 95°C (**Figure 1s**). The microscopic analysis of the nanofibers morphology confirmed the fracturing of the gold layer in a much shorter time, as a consequence of the rapid generation of the nitrogen gas occurring at higher temperatures.

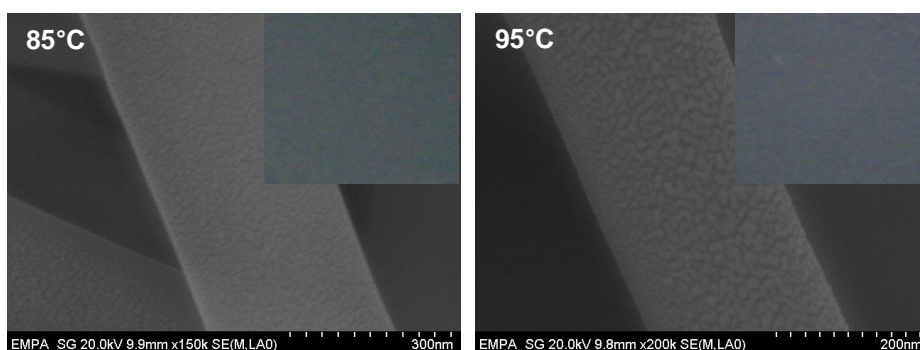

**Figure S1.** SEM micrographs of nanofibers heated at 85°C for 10 minutes and 95°C for 10 minutes. The inserts are photographs showing the macroscopic colors obtained after these heating times.
